# Supplementary material
Source: MDPI journal article supplement (https://www.mdpi.com/2073-4352/11/4/433)
Supplement: s1 [file s1]

# Characterising supramolecular architectures in crystals featuring I $\cdots$ Br halogen-bonding: Persistence of X $\cdots$ X' secondary-bonding in their congeners

Edward R.T. Tiekink <sup>1,\*</sup>

Research Centre for Crystalline Materials, School of Medical and Life Sciences, Sunway University,  
47500 Bandar Sunway, Selangor Darul Ehsan, Malaysia

\*Correspondence: [edwardt@sunway.edu.my](mailto:edwardt@sunway.edu.my); Tel.: +60-3-7491-7181

## \*\*\* SUPPLEMENTARY MATERIAL \*\*\*

**Table S1.** Details of composition, images and geometric details in crystals featuring I $\cdots$ Br interactions in **1-41**.

**Table S2.** Details of composition, images, unit-cell details and geometric details in congener crystals featuring putative X $\cdots$ X interactions.

**Table S1.** Details of composition, images and geometric details in crystals featuring I...Br interactions in **1-41**.

### Zero-dimensional aggregates

**1. OJACUY** (P)-3-(3-bromo-2-((iodoacetyl)(4-methoxybenzyl)amino)-5-methylphenyl)acrylic acid

Guthrie, D.B.; Geib, S.J.; Curran, D.P. Synthesis of highly enantioenriched 3,4-dihydroquinolin-2-ones by 6-exo-trig radical cyclizations of axially chiral  $\alpha$ -halo-ortho-alkenyl anilides. *J. Am. Chem. Soc.* 2009, 131, 15492-15500. doi: 10.1021/ja9066282.

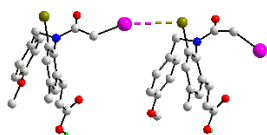

Four independent molecules with two being connected via one interaction; the second pair are connected similarly but, beyond the van der Waals radii [3.9125(11) Å].

$d(\text{I}\cdots\text{Br}) = 3.6830(11) \text{ \AA}$ ;  $\text{C-I}\cdots\text{Br} = 161.3(2)^\circ$  &  $\text{C-Br}\cdots\text{I} = 102.6(2)^\circ$

$d(\text{I}\cdots\text{Br}) = 3.9125(11) \text{ \AA}$ ;  $\text{C-I}\cdots\text{Br} = 116.2(2)^\circ$  &  $\text{C-Br}\cdots\text{I} = 154.8(2)^\circ$

**2. RECROI** 2,2'-dibromo-6-iodobiphenyl

Leroux, F.R.; Berthelot, A.; Bonnafoux, L.; Panossian, A.; Colobert, F. Transition-metal-free atropo-selective synthesis of biaryl compounds based on arynes. *Chem.-Eur. J.* 2012, 18, 14232-14236. doi: 10.1002/chem.201202739.

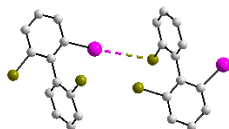

Two independent molecules connected via one interaction – supporting Br...Br contact at 3.6861(10) Å.

$d(\text{I}\cdots\text{Br}) = 3.7397(9) \text{ \AA}$ ;  $\text{C-I}\cdots\text{Br} = 172.38(19)^\circ$  &  $\text{C-Br}\cdots\text{I} = 85.37(16)^\circ$

$d(\text{Br}\cdots\text{Br}) = 3.6861(10) \text{ \AA}$ ;  $\text{C-Br}\cdots\text{Br} = 170.8(2)^\circ$  &  $\text{C-Br}\cdots\text{Br} = 86.91(16)^\circ$

### 3. DUPNIN 1,3-dibromo-2-iodo-5-nitrobenzene

Romero, J.A.; Aguirre Hernández, G.; Bernès, S. Anomalous halogen bonds in the crystal structures of 1,2,3-tri-bromo-5-nitro-benzene and 1,3-di-bromo-2-iodo-5-nitro-benzene. *Acta Crystallogr., Sect. E: Cryst. Commun.* 2015, 71, 960-965. doi: 10.1107/S2056989015013377.

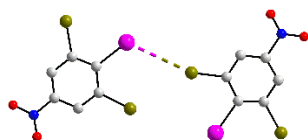

Two independent molecules connected via one interaction; the non-bonded I...Br contact within the dimer = 4.737(3) Å

$d(\text{I}\cdots\text{Br}) = 3.813(3) \text{ Å}$ ;  $\text{C-I}\cdots\text{Br} = 117.2(5)^\circ$  &  $\text{C-Br}\cdots\text{I} = 161.2(5)^\circ$

### 4. NEYSUG methyl (1'-(2-bromobenzyl)-5'-iodo-4-(4-methoxyphenyl(dimethyl)silyl)-3-methyl-2'-oxo-1',2',4,5-tetrahydro-3H-spiro(furan-2,3'-indol)-5-yl)acetate

Franz, A.K.; Dreyfuss, P.D.; Schreiber, S.L. Synthesis and cellular profiling of diverse organosilicon small molecules. *J. Am. Chem. Soc.* 2007, 129, 1020-1021. doi: 10.1021/ja067552n.

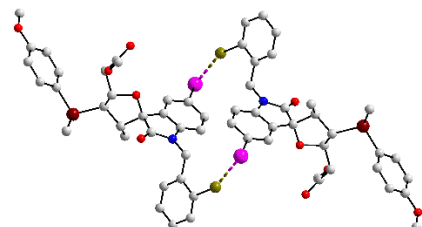

Two independent molecules, one self-associates into a centrosymmetric dimer. No other I...Br contacts less than the sum of the van der Waals radii

$d(\text{I}\cdots\text{Br}) = 3.5640(3) \text{ Å}$ ;  $\text{C-I}\cdots\text{Br} = 73.4(3)^\circ$  &  $\text{C-Br}\cdots\text{I} = 159.70(4)^\circ$

### 5. LOBHOB methyl 4-bromo-N-(2-iodophenyl)-b-(((4-methylphenyl)sulfonyl)amino)- $\alpha$ -phenylphenylalaninate

Qiu, L.; Wang, D.; Lv, F.; Guo, X.; Hu, W.; Yang, L.; Liu, S. Three-component reactions based on trapping ammonium ylides with N-sulfonyl aldimines via cooperative catalysis of squaramides and  $\text{Rh}_2(\text{OAc})_4$ . *Tetrahedron* 2014, 70, 1471-1477. doi: 10.1016/j.tet.2013.12.082.

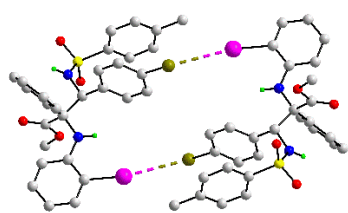

Centrosymmetric dimer

$d(I\cdots Br) = 3.6449(9) \text{ \AA}$ ;  $C-I\cdots Br = 160.07(13)^\circ$  &  $C-Br\cdots I = 124.72(15)^\circ$

## 6. SIZTED 6-bromo-4-iodo-2-methylisoquinolin-1(2H)-one

Fang, Z.; Wang, Y.; Wang, Y. Synthesis of 4-iodoisoquinolin-1(2H)-ones by a dirhodium(II)-catalyzed 1,4-bisfunctionalization of isoquinolinium iodide salts. *Org. Lett.* 2019, 21, 434-438. doi: 10.1021/acs.orglett.8b03614.

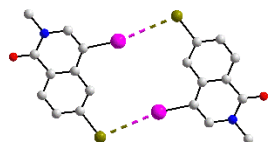

Two independent molecules; one self-assembles into a centrosymmetric dimer

$d(I\cdots Br) = 3.7068(13) \text{ \AA}$ ;  $C-I\cdots Br = 168.8(2)^\circ$  &  $C-Br\cdots I = 102.8(3)^\circ$

The other independent molecule also assembles into a centrosymmetric dimer via  $Br\cdots Br$  contacts

$d(I\cdots Br) = 3.7068(13) \text{ \AA}$ ;  $C-I\cdots Br = 168.8(2)^\circ$  &  $C-Br\cdots I = 102.8(3)^\circ$

## 7. QOCSUZ 1-((2-bromophenyl)ethynyl)-4-iodocubane

Flanagan, K.; Bernhard, S.S.R.; Plunkett, S.; Senge, M.O. Not Your Usual bioisosteres: Solid state study of 3D interactions in cubanes. *Chem.-Eur. J.* 2019, 25, 6941-6954. doi: 10.1002/chem.201806432.

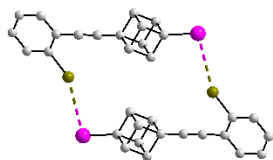

Centrosymmetric dimer

$d(I\cdots Br) = 3.7556(4) \text{ \AA}$ ;  $C-I\cdots Br = 93.01(5)^\circ$  &  $C-Br\cdots I = 155.75(6)^\circ$

## 8. KAGQUH 1-(4-bromo-3-iodophenyl)-1H-pyrrole

Messaoud, M.Y.A.; Bentabed-Ababsa, G.; Hedidi, M.; Derdour, A.; Chevallier, F.; Halauko, Y.S.; Ivashkevich, O.A.; Matulis, V.E.; Picot, L.; Thiéry, V.; Roisnel, T.; Dorcet, V.; Mongin, F.

Deproto-metallation of N-arylated pyrroles and indoles using a mixed lithium–zinc base and regioselectivity-computed CH acidity relationship. *Beilstein J. Org. Chem.* 2015, 11, 1475–1485. doi: 10.3762/bjoc.11.160.

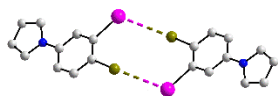

Centrosymmetric dimer

$d(\text{I}\cdots\text{Br}) = 3.8122(5) \text{ \AA}$ ;  $\text{C}-\text{I}\cdots\text{Br} = 117.83(10)^\circ$  &  $\text{C}-\text{Br}\cdots\text{I} = 166.26(12)^\circ$

#### 9. VIXWIL 2-bromo-1,10-phenanthroline 1,3,5-trifluoro-2,4,6-triiodobenzene

Zhang, Y.; Wang, J.-G.; Wang, W. Noncovalent interactions between 1,3,5-trifluoro-2,4,6-triiodobenzene and a series of 1,10-phenanthroline derivatives: A combined theoretical and experimental study. *Crystals* 2019, 9, 140. doi: 10.3390/cryst9030140.

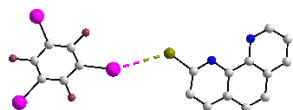

1:1 co-crystal

$d(\text{I}\cdots\text{Br}) = 3.6927(7) \text{ \AA}$ ;  $\text{C}-\text{I}\cdots\text{Br} = 156.68(11)^\circ$  &  $\text{C}-\text{Br}\cdots\text{I} = 130.84(14)^\circ$

Also present but just beyond the van der Waals radii are type-I  $\text{I}\cdots\text{F}$  interactions which connected the aggregates into a helical chain

$d(\text{I}\cdots\text{F}) = 3.452(3) \text{ \AA}$ ;  $\text{C}-\text{I}\cdots\text{F} = 154.09(11)^\circ$  &  $\text{C}-\text{Br}\cdots\text{I} = 146.5(2)^\circ$

### Linear chains

#### 10. MUJKUY (R)-4-(4-bromophenyl)-4-(3-iodo-1H-indol-2-yl)butan-2-one

Hong, L.; Sun, W.; Liu, C.; Wang, L.; Wong, K.; Wang, R. Enantioselective Friedel–Crafts alkylation of 4,7-dihydroindoles with enones catalyzed by primary–secondary diamines. *Chem.-Eur. J.* 2009, 15, 11105–11108. doi: 10.1002/chem.200901635.

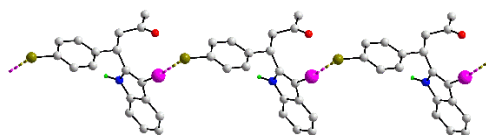

$d(\text{I}\cdots\text{Br}) = 3.5402(4) \text{ \AA}$ ;  $\text{C}-\text{I}\cdots\text{Br} = 169.74(9)^\circ$  &  $\text{C}-\text{Br}\cdots\text{I} = 121.58(9)^\circ$

**11. MAMFIS** 2,3-dibromo-5-iodo-1,4-naphthoquinone

Jardim, G.A.M.; da Silva Júnior, E.N.; Bower, J.F. Overcoming naphthoquinone deactivation: Rhodium-catalyzed C-5 selective C–H iodination as a gateway to functionalized derivatives. *Chem. Sci.* 2016, 7, 3780-3784. doi: 10.1039/C6SC00302H.

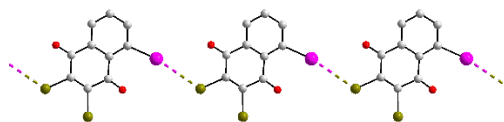

$d(\text{I}\cdots\text{Br}) = 3.540(2) \text{ \AA}$ ;  $\text{C}-\text{I}\cdots\text{Br} = 173.67(16)^\circ$  &  $\text{C}-\text{Br}\cdots\text{I} = 91.44(19)^\circ$

**12. SUWKUT** 1-(5-bromo-2-iodophenyl)propan-2-one

Bian, H.-L.; Tang, S.-Z.; Chen, M.-E.; Zhang, X.-M.; Lv, J.-W.; Chen, X.-W.; Qi, F.-M.; Chen, S.-W.; Zhang, F.-M. Transition-metal-free site-selective  $\gamma\text{-C}(\text{sp}^2)\text{-H}$  monoiodination of arenes directed by an aliphatic keto group. *Org. Lett.* 2020, 22, 5314-5319. doi: 10.1021/acs.orglett.0c01466.

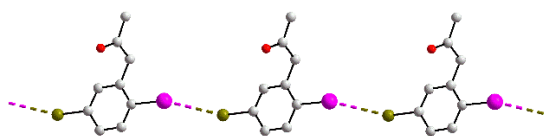

$d(\text{I}\cdots\text{Br}) = 3.6421(9) \text{ \AA}$ ;  $\text{C}-\text{I}\cdots\text{Br} = 161.23(11)^\circ$  &  $\text{C}-\text{Br}\cdots\text{I} = 160.90(13)^\circ$

**13. CIQMEV** 1-(3-bromopropoxy)-4-iodobenzene

Wu, Z.; Liu, X.; Shen, P.; Jiang, S. 1-(3-Bromopropoxy)-4-iodobenzene. *Acta Crystallogr., Sect. E: Struct. Rep. Online* 2007, 63, o4760. doi: 10.1107/S1600536807058801.

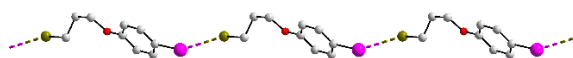

$d(\text{I}\cdots\text{Br}) = 3.6623(10) \text{ \AA}$ ;  $\text{C}-\text{I}\cdots\text{Br} = 155.87(8)^\circ$  &  $\text{C}-\text{Br}\cdots\text{I} = 160.15(9)^\circ$

**14. CORZER** 5-bromo-4-iodo-1-[[4-(trifluoromethyl)phenyl]methyl]-1H-1,2,3-triazole

Rheingold, A.L. Private Communication to the Cambridge Structural Database (2019), Refcode CORZER.

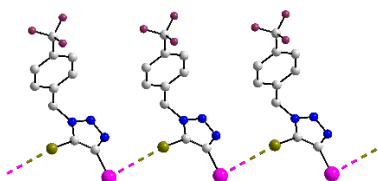

$d(\text{I}\cdots\text{Br}) = 3.7163(11) \text{ \AA}$ ;  $\text{C}-\text{I}\cdots\text{Br} = 84.5(3)^\circ$  &  $\text{C}-\text{Br}\cdots\text{I} = 148.8(3)^\circ$

$\text{Br}\cdots\text{F}$  interactions just above the van der Waals radii connect chains into a supramolecular tube

$d(\text{Br}\cdots\text{F}) = 3.322(9) \text{ \AA}$ ;  $\text{C}-\text{Br}\cdots\text{F} = 75.8(3)^\circ$  &  $\text{C}-\text{F}\cdots\text{Br} = 133.1(7)^\circ$

**15. VOQQIC** 3-bromo-N'-(2-hydroxy-3,5-diiodobenzylidene)benzohydrazide monohydrate

Ning, J.-H.; Xu, X.-W. 3-Bromo-N'-(2-hydroxy-3,5-diiodobenzylidene)benzohydrazide monohydrate. Acta Crystallogr., Sect. E: Struct. Rep. Online 2009, 65, o905-o906. doi: 10.1107/S1600536809010964.

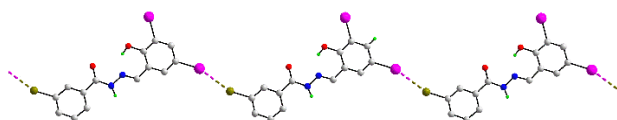

$\text{I}\cdots\text{O}$  interactions of  $2.930(5) \text{ \AA}$  link chains into a double-layer

$d(\text{I}\cdots\text{Br}) = 3.7169(12) \text{ \AA}$ ;  $\text{C}-\text{I}\cdots\text{Br} = 149.09(17)^\circ$  &  $\text{C}-\text{Br}\cdots\text{I} = 140.37(19)^\circ$

**16. HIRHUM** 2,4-dibromo-6-(4-iodophenyliminomethyl)phenol

Guo, M.-L.; Nong, X.-R.; Yin, H. 2,4-Dibromo-6-(4-iodo-phenyl-imino-methyl)phenol. Acta Crystallogr., Sect. E: Struct. Rep. Online 2007, 63, o4640. doi: 10.1107/S1600536807055675.

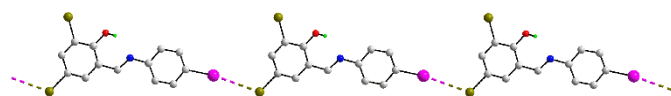

$d(\text{I}\cdots\text{Br}) = 3.7226(16) \text{ \AA}$ ;  $\text{C}-\text{I}\cdots\text{Br} = 166.3(3)^\circ$  &  $\text{C}-\text{Br}\cdots\text{I} = 112.8(3)^\circ$

**17. QAPQAC** 9-(4-bromophenyl)-3,6-diiodo-9H-carbazole

Tang, G.-M.; Chi, R.-H.; Wan, W.-Z.; Wang, Y.-T.; Cui, Y.-Z.; Ng, S.W. Synthesis, crystal structures, and nonlinear optic and thermal properties of two diiodocarbazole derivatives. J. Chem. Res. 2017, 41, 79-81. doi: 10.3184/174751917X14839766277297.

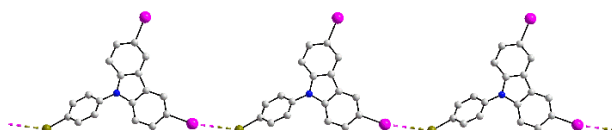

$d(\text{I}\cdots\text{Br}) = 3.7228(12) \text{ \AA}$ ;  $\text{C}-\text{I}\cdots\text{Br} = 158.5(2)^\circ$  &  $\text{C}-\text{Br}\cdots\text{I} = 135.2(2)^\circ$

**18. YIRTOJ** 5-bromo-2-iodo-1,3-dimethylbenzene

Liu, R.; Li, Y.-H.; Luo, W.; Liu, S.; Zhu, H.-J. 5-Bromo-2-iodo-1,3-dimethylbenzene. Acta Crystallogr., Sect. E: Struct. Rep. Online 2008, 64, o219. doi: 10.1107/S1600536807064537.

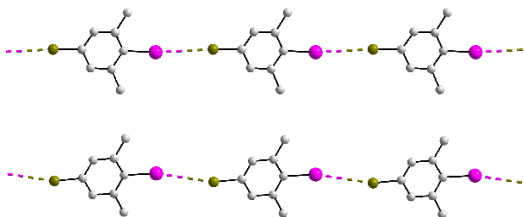

Three independent molecules: two self-associate into linear chains. The iodide and bromide atoms in the third molecule do not form a halogen bonding interaction  $< 4.0 \text{ \AA}$

$d(\text{I} \cdots \text{Br}) = 3.6869(15) \text{ \AA}$ ;  $\text{C}-\text{I} \cdots \text{Br} = 162.8(2)^\circ$  &  $\text{C}-\text{Br} \cdots \text{I} = 161.1(3)^\circ$  {top view}

$d(\text{I} \cdots \text{Br}) = 3.7413(15) \text{ \AA}$ ;  $\text{C}-\text{I} \cdots \text{Br} = 159.8(3)^\circ$  &  $\text{C}-\text{Br} \cdots \text{I} = 156.0(3)^\circ$

**19. CABCAM** (R,R,R)-3-(4-(2-(2,4-dibromo-5-methoxyphenyl)ethyl)-2-(iodomethyl)-2-methyl-5-oxotetrahydrofuran-3-yl)propyl acetate

Kaluza, N.M.; Schollmeyer, D.; Nubbemeyer, U. Total synthesis of (-)-C/D-cis-de-hydro-3-O-methyl-estradiols. Eur. J. Org. Chem. 2016, 2016, 357-366. doi: 10.1002/ejoc.201501341.

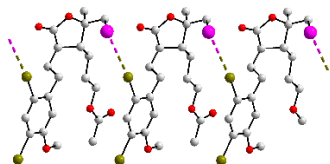

$d(\text{I} \cdots \text{Br}) = 3.7558(13) \text{ \AA}$ ;  $\text{C}-\text{I} \cdots \text{Br} = 84.5(3)^\circ$  &  $\text{C}-\text{Br} \cdots \text{I} = 171.2(4)^\circ$

**20. MESMED** 2,5-diiodo-1,4-bis(bromomethyl)benzene

Gaefke, G.; Enkelmann, V.; Höger, S. A practical synthesis of 1,4-diiodo-2,5-bis(chloromethyl)benzene and 1,4-diiodo-2,5-bis(bromomethyl)benzene. Synthesis 2006, 2971-2973. doi: 10.1055/s-2006-942534.

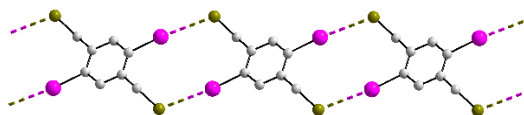

Molecule is centrosymmetric

$d(\text{I} \cdots \text{Br}) = 3.6271(4) \text{ \AA}$ ;  $\text{C}-\text{I} \cdots \text{Br} = 166.66(7)^\circ$  &  $\text{C}-\text{Br} \cdots \text{I} = 97.45(10)^\circ$

## Zig-zag chains

### 21. YIZFUL 6-(2-bromophenyl)-5-iodo-2,3-dihydro-4H-pyran-4-one

Gholap, S.P; Jangid, D.; Fernandes, R.A. Metal-free Brønsted acid-catalyzed rearrangement of  $\delta$ -hydroxyalkynones to 2,3-dihydro-4H-pyran-4-ones: Total synthesis of obolactone and a catechol pyran isolated from *Plectranthus sylvestris*. J. Org. Chem. 2019, 84, 3537-3551. doi: 10.1021/acs.joc.8b03141.

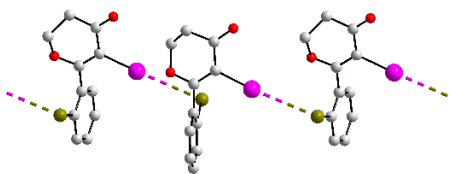

Glide symmetry

$d(I\cdots Br) = 3.6011(6) \text{ \AA}$ ;  $C-I\cdots Br = 175.22(11)^\circ$  &  $C-Br\cdots I = 103.29(13)^\circ$

### 22. JIPTEK 1-bromo-4-(2-bromo-2-iodo-1-phenylethenyl)-2,3,5,6-tetramethylbenzene

Maji, B.; Bhattacharya, A.; Hazra, S. Halogen-induced Friedel-Crafts alkenylation reactions with haloalkynes: Direct access to gem-1, 1-dihaloalkenes. Chem. Sel. 2017, 2, 10375-10378. doi: 10.1002/slct.201702265.

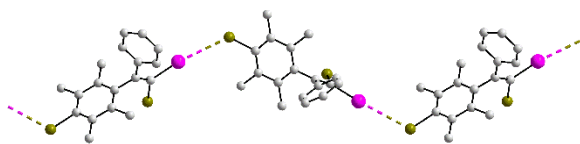

Glide symmetry

$d(I\cdots Br) = 3.640(1) \text{ \AA}$ ;  $C-I\cdots Br = 168.25(17)^\circ$  &  $C-Br\cdots I = 118.41(17)^\circ$

### 23. SELYOY 7-bromo-7-iodo-perhydro-1-azocin-2-one

Hu, T.; Shen, M.; Chen, Q.; Li, C. Pushing radical cyclization from regioselective to regiospecific: Cyclization of amidyl radicals controlled by vinylic halogen substitution. Org. Lett. 2006, 8, 2647-2650. doi: 10.1021/ol060983q.

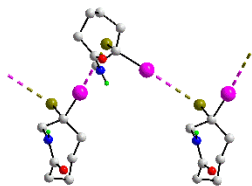

Glide symmetry

$d(I\cdots Br) = 3.6666(12) \text{ \AA}$ ;  $C-I\cdots Br = 175.7(2)^\circ$  &  $C-Br\cdots I = 115.3(2)^\circ$

**24. JINJUO** 1-(4-bromophenyl)-3-iodo-1H-pyrrole

Wang, F.; Zhang, X.; He, Y.; Fan, X. Selective synthesis of pyrrolidin-2-ones and 3-iodopyrroles via the ring contraction and deformylative functionalization of piperidine derivatives. *Org. Biomol. Chem.* 2019, 17, 156-164. doi: 10.1039/C8OB02640H.

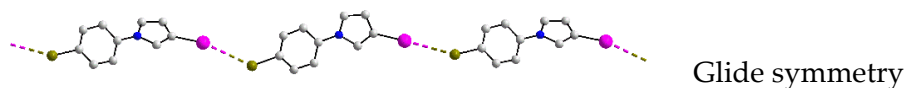

$d(I\cdots Br) = 3.691(3) \text{ \AA}$ ;  $C-I\cdots Br = 151.5(4)^\circ$  &  $C-Br\cdots I = 126.0(5)^\circ$

**25. MOZTED** ethyl 5-bromo-4-iodo-2-methyl-1H-pyrrole-3-carboxylate

Pandeeti, O.; Bijigiri, S.K.; Panda, P.K. One-pot synthesis of benzotripyrrole derivatives from 1H-pyrroles. *New J. Chem.* 2019, 43, 18437-18841. doi: 10.1039/C9NJ04700J.

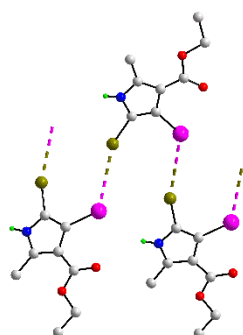

Two independent molecules associate and the two-molecule aggregates are connected into a zig-zag chain (glide symmetry)

$d(I\cdots Br) = 3.7380(17) \text{ \AA}$ ;  $C-I\cdots Br = 127.2(3)^\circ$  &  $C-Br\cdots I = 151.3(4)^\circ$

$d(I\cdots Br) = 3.7905(14) \text{ \AA}$ ;  $C-I\cdots Br = 126.8(3)^\circ$  &  $C-Br\cdots I = 158.3(4)^\circ$

**26. BULZIU** 4-(1,2-dibromo-2-iodoethenyl)benzonitrile

Zeng, X.; Liu, S.; Yang, Y.; Yang, Y.; Hammond, G.B.; Xu, B. Regio- and stereoselective synthesis of 1,2-dihaloalkenes using in-situ-generated ICl, IBr, BrCl, I<sub>2</sub>, and Br<sub>2</sub>. *Cell Press: Chem.* 2020, 6, 1018-1031. doi: 10.1016/j.chempr.2020.03.011.

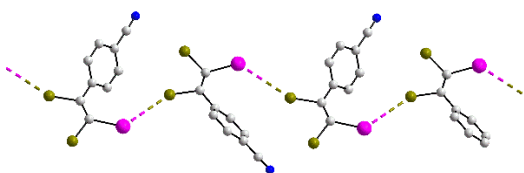

Glide symmetry

$d(I\cdots Br) = 3.8025(5) \text{ \AA}$ ;  $C-I\cdots Br = 127.28(11)^\circ$  &  $C-Br\cdots I = 152.94(12)^\circ$

## Helical chains

### 27. **BUNBAQ** N-[2-(4-bromophenyl)-1-chloro-2-iodoethenyl]-N,4-dimethylbenzene-1-sulfonamide

Zeng, X.; Liu, S.; Yang, Y.; Yang, Y.; Hammond, G.B.; Xu, B. Regio- and stereoselective synthesis of 1,2-dihaloalkenes using in-situ-generated ICl, IBr, BrCl, I<sub>2</sub>, and Br<sub>2</sub>. *Cell Press: Chem.* 2020, 6, 1018-1031. doi: 10.1016/j.chempr.2020.03.011.

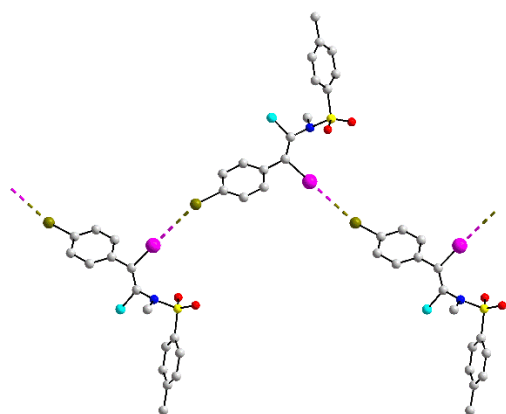

2<sub>1</sub>-screw symmetry

$d(\text{I} \cdots \text{Br}) = 3.6889(8) \text{ \AA}$ ;  $\text{C}-\text{I} \cdots \text{Br} = 169.87(9)^\circ$  &  $\text{C}-\text{Br} \cdots \text{I} = 138.90(11)^\circ$

Extra I $\cdots$ Br interactions [ $3.8353(6) \text{ \AA}$ ] longer the van der Waals radii link chains into a layer

$d(\text{I} \cdots \text{Br}) = 3.8353(6) \text{ \AA}$ ;  $\text{C}-\text{I} \cdots \text{Br} = 72.94(10)^\circ$  &  $\text{C}-\text{Br} \cdots \text{I} = 157.93(11)^\circ$

### 28. **CIQLEU** 1-bromomethyl-2-iodobenzene

Betz, R.; Klüfers, P. 1-Bromomethyl-2-iodobenzene. *Acta Crystallogr., Sect. E: Struct. Rep. Online* 2007, 63, o4753. doi: 10.1107/S1600536807058151.

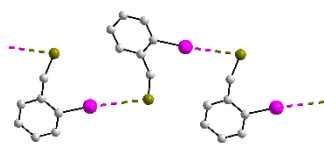

2<sub>1</sub>-screw symmetry

$d(\text{I} \cdots \text{Br}) = 3.6943(4) \text{ \AA}$ ;  $\text{C}-\text{I} \cdots \text{Br} = 170.95(7)^\circ$  &  $\text{C}-\text{Br} \cdots \text{I} = 90.81(11)^\circ$

### 29. **IMURAL** 3,3'-dibromo-2,2',5,5'-tetraiodo-4,4'-bipyridine

Mamane, V.; Peluso, P.; Aubert, E.; Cossu, S.; Pale, P. Chiral hexahalogenated 4,4'-bipyridines. *J. Org. Chem.* 2016, 81, 4576-4587. doi: 10.1021/acs.joc.6b00413.

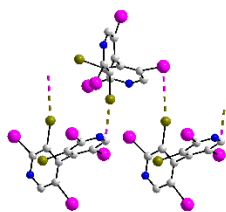

2<sub>1</sub>-screw symmetry

$d(I\cdots Br) = 3.7136(15) \text{ \AA}$ ;  $C-I\cdots Br = 78.41(9)^\circ$  &  $C-Br\cdots I = 170.13(11)^\circ$

### 30. INADIM 2,2',3,3'-tetrabromo-5,5'-diiodo-4,4'-bipyridine

Mamane, V.; Peluso, P.; Aubert, E.; Cossu, S.; Pale, P. Chiral hexahalogenated 4,4'-bipyridines. J. Org. Chem. 2016, 81, 4576-4587. doi: 10.1021/acs.joc.6b00413.

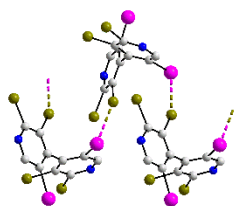

2<sub>1</sub>-screw symmetry

$d(I\cdots Br) = 3.7281(18) \text{ \AA}$ ;  $C-I\cdots Br = 71.91(14)^\circ$  &  $C-Br\cdots I = 161.19(15)^\circ$

### 31. IMUQOY 2,2',5,5'-tetrabromo-3,3'-diiodo-4,4'-bipyridine

Mamane, V.; Peluso, P.; Aubert, E.; Cossu, S.; Pale, P. Chiral hexahalogenated 4,4'-bipyridines. J. Org. Chem. 2016, 81, 4576-4587. doi: 10.1021/acs.joc.6b00413.

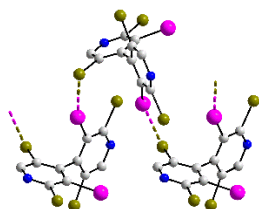

2<sub>1</sub>-screw symmetry

$d(I\cdots Br) = 3.7330(7) \text{ \AA}$ ;  $C-I\cdots Br = 162.62(7)^\circ$  &  $C-Br\cdots I = 81.66(7)^\circ$

### 32. FABWIR 7-(4-bromophenyl)-1-chloro-6-iodonaphthalene

Lehnherr, D.; Alzola, J.M.; Lobkovsky, E.B.; Dichtel, W.R. Regioselective synthesis of polyheterohalogenated naphthalenes via the benzannulation of haloalkynes. Chem.-Eur. J. 2015, 21, 18122-18127. doi: 10.1002/chem.201503418.

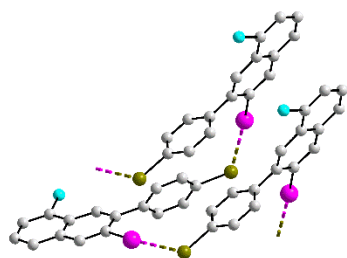

Two independent molecules – one self-associates into a helical chain ( $2_1$ -screw symmetry). No  $I\cdots Br < 4.0$  Å for the second molecule and no  $X\cdots X$  less than the sum of the van der Waals radii.  $d(I\cdots Br) = 3.7592(4)$  Å;  $C-I\cdots Br = 173.40(6)^\circ$  &  $C-Br\cdots I = 104.68(8)^\circ$   
 $Br\cdots Cl$  contacts beyond the van der Waals radii (shortest =  $3.6511(8)$  Å) link both independent molecules into a 2-D array.

**33. ZIMLIT** (R)-4-benzyl-3-((S)-2-(6-bromopyridin-2-yl)-4-iodopent-4-enoyl)oxazolidin-2-one

Barát, V.; Csókás, D.; Bates, R.W. Synthesis of (–)-cytisine using a 6-endo aza-Michael addition. J. Org. Chem. 2018, 83, 9088-9095. doi: 10.1021/acs.joc.8b01156.

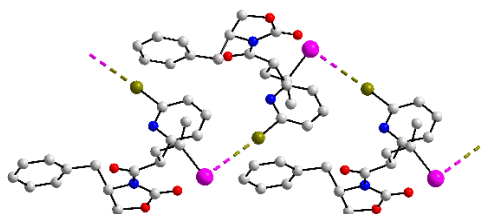

$2_1$ -screw symmetry

$d(I\cdots Br) = 3.7631(7)$  Å;  $C-I\cdots Br = 87.09(15)^\circ$  &  $C-Br\cdots I = 168.75(18)^\circ$

**34. WUJYUY** (R)-N-(4-bromophenyl)-2-(2-iodophenyl)hexanamide

Tian, J.; Luo, F.; Zhang, Q.; Liang, Y.; Li, D.; Zhan, Y.; Kong, L.; Wang, Z.-X.; Peng, B. Asymmetric iodonio-[3,3]-sigmatropic rearrangement to access chiral  $\alpha$ -aryl carbonyl compounds. J. Am. Chem. Soc. 2020, 142, 6884-6890. doi: 10.1021/jacs.0c00783.

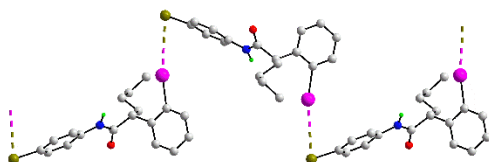

Two independent molecules: only one forms  $I\cdots Br$  interactions ( $2_1$ -screw symmetry). For the second molecule, no  $X\cdots X$  interactions  $< 4.0$  Å are apparent. The independent molecules are connected into a supramolecular chain via amide- $N-H\cdots O$ (carbonyl) hydrogen-bonds, also having  $2_1$ -screw symmetry (different direction)

$d(I\cdots Br) = 3.7724(9) \text{ \AA}$ ;  $C-I\cdots Br = 167.18(16)^\circ$  &  $C-Br\cdots I = 76.25(18)^\circ$

**35. IKUZAR** 2-bromo-4,5-diiodo-1,3-thiazole

Shi, Q.; Zhang, S.; Zhang, J.; Oswald, V.F.; Amassian, A.; Marder, S.R.; Blakey, S.B. KO<sup>t</sup>Bu-initiated aryl C–H iodination: A powerful tool for the synthesis of high electron affinity compounds. *J. Am. Chem. Soc.* 2016, 138, 3946–3949. doi: 10.1021/jacs.5b12259.

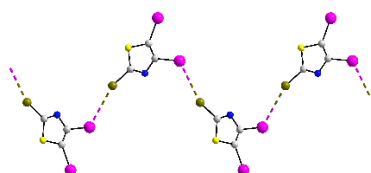

$2_1$ -screw symmetry

$d(I\cdots Br) = 3.7966(13) \text{ \AA}$ ;  $C-I\cdots Br = 107.0(3)^\circ$  &  $C-Br\cdots I = 160.7(3)^\circ$

**36. GUMMEI** 4-bromo-1-chloro-2-(1-(4-ethoxyphenyl)-2-iodoethyl)benzene

Zhang, S.; Wang, W.; Li, C.; Liu, P.; Xu, W.; Tang, L.; Wang, J.; Zhao, G. Facile synthesis of enantiomerically pure 1-(5-bromo-2-chlorophenyl)-1-(4-ethoxyphenyl)ethane. *Chem. Res. Chin. Univ.* 2014, 30, 250–256. doi: 10.1007/s40242-014-3257-1.

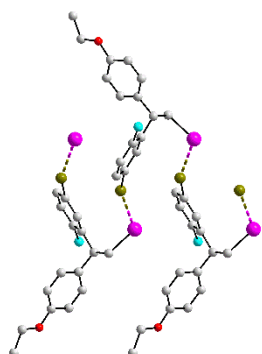

$2_1$ -screw symmetry

$d(I\cdots Br) = 3.7973(9) \text{ \AA}$ ;  $C-I\cdots Br = 103.12(13)^\circ$  &  $C-Br\cdots I = 159.62(14)^\circ$

**37. GUMLUX** 4-bromo-1-chloro-2-(1-(4-ethoxyphenyl)-2-iodoethyl)benzene

Zhang, S.; Wang, W.; Li, C.; Liu, P.; Xu, W.; Tang, L.; Wang, J.; Zhao, G. Facile synthesis of enantiomerically pure 1-(5-bromo-2-chlorophenyl)-1-(4-ethoxyphenyl)ethane. *Chem. Res. Chin. Univ.* 2014, 30, 250–256. doi: 10.1007/s40242-014-3257-1.

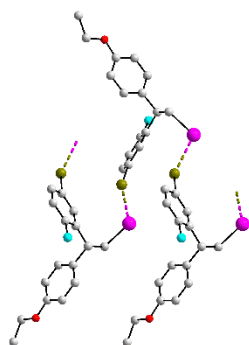

2<sub>1</sub>-screw symmetry

$d(I\cdots Br) = 3.8053(7) \text{ \AA}$ ;  $C-I\cdots Br = 103.40(10)^\circ$  &  $C-Br\cdots I = 159.58(11)^\circ$

### 38. VEXDAG 1-[1-(4-bromophenyl)-2-iodoethoxy]-1H-benzotriazole

Sun, K.; Zhang, S.; Liu, Z.; Lv, Y. Eco-friendly C–I and C–O bond formation of simple alkenes: Direct access to  $\beta$ -iodo oxyamines. *Chem. Sel.* 2018, 3, 5766-5768. doi: 10.1002/slct.201800878.

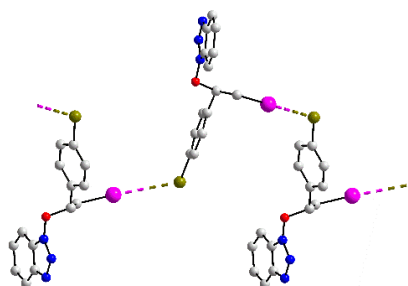

2<sub>1</sub>-screw symmetry

$d(I\cdots Br) = 3.8001(10) \text{ \AA}$ ;  $C-I\cdots Br = 165.44(11)^\circ$  &  $C-Br\cdots I = 121.92(14)^\circ$

### 39. IMURUF 5,5'-dibromo-2,2',3,3'-tetraiodo-4,4'-bipyridine

Mamane, V.; Peluso, P.; Aubert, E.; Cossu, S.; Pale, P. Chiral hexahalogenated 4,4'-bipyridines. *J. Org. Chem.* 2016, 81, 4576-4587. doi: 10.1021/acs.joc.6b00413.

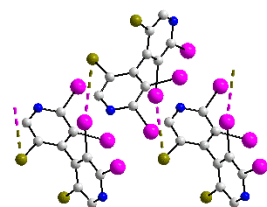

2<sub>1</sub>-screw symmetry

$d(I\cdots Br) = 3.8140(9) \text{ \AA}$ ;  $C-I\cdots Br = 169.03(7)^\circ$  &  $C-Br\cdots I = 77.36(8)^\circ$

## Two-dimensional array

### 40. VEGSOR (5-iodopyridinium-2-yl)([4-bromophenyl]sulfonyl)azanide

Gelbrich, T.; Threlfall, T.L.; Hursthouse, M.B. XPac dissimilarity parameters as quantitative descriptors of isostructurality: The case of fourteen 4,5'-substituted benzenesulfonamido-2-pyridines obtained by substituent interchange involving CF<sub>3</sub>/I/Br/Cl/F/Me/H.

CrystEngComm 2012, 14, 5454-5464. doi: 10.1039/c2ce25508a.

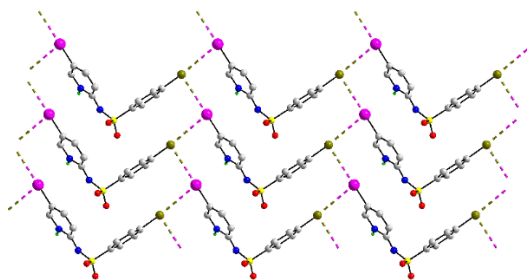

Flat topology

$d(\text{I}\cdots\text{Br}) = 3.7436(5) \text{ \AA}$ ;  $\text{C-I}\cdots\text{Br} = 158.64(11)^\circ$ ;  $\text{C-Br}\cdots\text{I} = 87.49(12)^\circ$

$d(\text{I}\cdots\text{Br}) = 3.7465(6) \text{ \AA}$ ;  $\text{C-I}\cdots\text{Br} = 80.73(11)^\circ$ ;  $\text{C-Br}\cdots\text{I} = 172.51(12)^\circ$

{Evidence for a  $\text{S=O}\cdots\pi(\text{arene})$  contact within the pictured array with the  $\text{O}\cdots\text{Cg}(\text{arene})$  separation being  $3.137(3) \text{ \AA}$  and angle at O being  $127.86(16)^\circ$ . This separation shorter than the assumed van der Waals radius of O ( $1.52 \text{ \AA}$ ) and half a phenyl ring ( $1.80 \text{ \AA}$ )

C. Janiak, J. Chem. Soc., Dalton Trans., 2000, 3885–3896. doi: 10.1039/B003010O}

## Three-dimensional architecture

### 41. INADOS 5,5'-dibromo-2,2'-dichloro-3,3'-diiodo-4,4'-bipyridine

Mamane, V.; Peluso, P.; Aubert, E.; Cossu, S.; Pale, P. Chiral hexahalogenated 4,4'-bipyridines. J. Org. Chem. 2016, 81, 4576-4587. doi: 10.1021/acs.joc.6b00413.

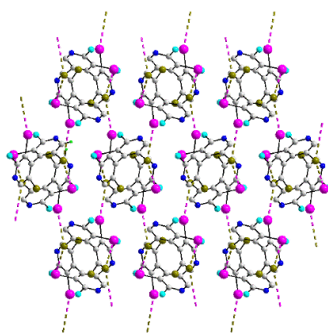

$d(\text{I}\cdots\text{Br}) = 3.6944(7) \text{ \AA}$ ;  $\text{C-I}\cdots\text{Br} = 161.40(5)^\circ$  &  $\text{C-Br}\cdots\text{I} = 83.20(5)^\circ$

$d(\text{I}\cdots\text{Br}) = 3.7405(5) \text{ \AA}$ ;  $\text{C-I}\cdots\text{Br} = 95.99(5)^\circ$  &  $\text{C-Br}\cdots\text{I} = 155.52(5)^\circ$

**Table S2.** Details of composition, images, unit-cell details and geometric details in congener crystals featuring putative X...X interactions.

**2. RECROI**      2,2'-dibromo-6-iodobiphenyl

Leroux, F.R.; Berthelot, A.; Bonnafoux, L.; Panossian, A.; Colobert, F. Transition-metal-free atropo-selective synthesis of biaryl compounds based on arynes. *Chem.-Eur. J.* 2012, 18, 14232-14236. doi: 10.1002/chem.201202739.

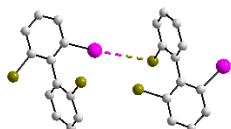

Two independent molecules connected via one interaction

orthorhombic  $P2_12_12$ ,  $Z' = 2$ ;  $a = 16.7820(4)$ ,  $b = 18.8039(5)$ ,  $c = 7.9459(2)$  Å,  $\beta = 91.429(3)^\circ$

$d(I\cdots Br) = 3.7397(9)$  Å;  $C-I\cdots Br = 172.38(19)^\circ$  &  $C-Br\cdots I = 85.37(16)^\circ$

**RECSAV**      2'-bromo-2-chloro-6-iodobiphenyl

monoclinic  $C2$ ,  $Z' = 2$ ;  $a = 21.2611(10)$ ,  $b = 7.9582(2)$ ,  $c = 16.1680(8)$  Å,  $\beta = 114.519(2)^\circ$

$d(I\cdots Br) = 3.8303(9)$  Å;  $C-I\cdots Br = 167.5(2)^\circ$  &  $C-Br\cdots I = 90.87(18)^\circ$

{the Br substituted by a Cl in the disubstituted ring, leaving one each of I and Br; not isostructural; interaction persists but at the van der Waals limit}

**3. DUPNIN**      1,3-dibromo-2-iodo-5-nitrobenzene

Romero, J.A.; Aguirre Hernández, G.; Bernès, S. Anomalous halogen bonds in the crystal structures of 1,2,3-tri-bromo-5-nitro-benzene and 1,3-di-bromo-2-iodo-5-nitro-benzene. *Acta Crystallogr., Sect. E: Cryst. Commun.* 2015, 71, 960-965. doi: 10.1107/S2056989015013377.

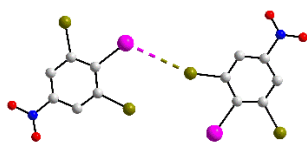

Two independent molecules connected via one interaction; the non-bonded contact within the dimer =  $4.737(3)$  Å

monoclinic  $P2_1/c$ ,  $Z' = 2$ ;  $a = 13.548(3)$ ,  $b = 20.037(3)$ ,  $c = 9.123(2)$  Å,  $\beta = 130.37(2)^\circ$

$d(I\cdots Br) = 3.813(3)$  Å;  $C-I\cdots Br = 117.2(5)^\circ$  &  $C-Br\cdots I = 161.2(5)^\circ$

DUPNEJ 1,2,3-tribromo-5-nitrobenzene

Triclinic  $P\bar{1}$ ,  $Z' = 2$ ;  $a = 7.641(5)$ ,  $b = 8.040(5)$ ,  $c = 14.917(6)$  Å,  $\alpha = 83.91(3)$ ,  $\beta = 79.86(4)$ ,  $\gamma = 81.94(4)^\circ$

$d(\text{Br}\cdots\text{Br}) = 3.642(3)$  Å;  $\text{C}-\text{Br}\cdots\text{Br} = 165.2(4)^\circ$  &  $\text{C}-\text{Br}\cdots\text{Br} = 82.2(5)^\circ$

{the I substituted by a Br; not isostructural; is with HIBWIY; Br $\cdots$ Br involving equivalent atoms}

HIBWIY 3,4,5-trichloronitrobenzene

Bhar, A.; Aune, J.P.; Benali-Cherif, N.; Benmenni, L.; Giorgi, M. Three polychloromononitrobenzenes:  $\text{C}_6\text{H}_3\text{Cl}_2\text{NO}_2$ ,  $\text{C}_6\text{H}_2\text{Cl}_3\text{NO}_2$  and  $\text{C}_6\text{HCl}_4\text{NO}_2$ . *Acta Crystallogr., Sect. C: Cryst. Struct. Commun.* 51 (1995) 256-260. doi: 10.1107/S0108270194002957

Triclinic  $P\bar{1}$ ,  $Z' = 2$ ;  $a = 7.842(2)$ ,  $b = 14.450(5)$ ,  $c = 7.548(2)$  Å,  $\alpha = 101.08(2)$ ,  $\beta = 98.10(2)$ ,  $\gamma = 84.38(3)^\circ$

$d(\text{Cl}\cdots\text{Cl}) = 3.571(3)$  Å;  $\text{C}-\text{Cl}\cdots\text{Cl} = 168.1(2)^\circ$  &  $\text{C}-\text{Cl}\cdots\text{Cl} = 82.5(2)^\circ$

{all X substituted by a Cl; not isostructural; is isostructural with DUPNEJ; Cl $\cdots$ Cl involving equivalent atoms}

## 9. VIXWIL 2-bromo-1,10-phenanthroline 1,3,5-trifluoro-2,4,6-triiodobenzene

Zhang, Y.; Wang, J.-G.; Wang, W. Noncovalent interactions between 1,3,5-trifluoro-2,4,6-triiodobenzene and a series of 1,10-phenanthroline derivatives: A combined theoretical and experimental study. *Crystals* 2019, 9, 140. doi: 10.3390/cryst9030140.

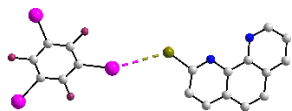

1:1 co-crystal

Monoclinic  $P2_1/c$ ,  $Z' = 1$  (pair);  $a = 14.2515(4)$ ,  $b = 18.2923(6)$ ,  $c = 7.6939(3)$  Å,  $\beta = 90.725(3)^\circ$

$d(\text{I}\cdots\text{Br}) = 3.6927(7)$  Å;  $\text{C}-\text{I}\cdots\text{Br} = 156.68(11)^\circ$  &  $\text{C}-\text{Br}\cdots\text{I} = 130.84(14)^\circ$

VIXWUX 2-chloro-1,10-phenanthroline 1,3,5-trifluoro-2,4,6-triiodobenzene

Monoclinic  $P2_1/c$ ,  $Z' = 1$ ;  $a = 14.2733(5)$ ,  $b = 18.2696(6)$ ,  $c = 7.6371(4)$  Å,  $\beta = 91.662(3)^\circ$

$d(\text{I}\cdots\text{Cl}) = 3.6748(15)$  Å;  $\text{C}-\text{I}\cdots\text{Cl} = 158.55(11)^\circ$  &  $\text{C}-\text{Cl}\cdots\text{I} = 133.47(16)^\circ$

$d(\text{I}\cdots\text{F}) = 3.436(3) \text{ \AA}$ ;  $\text{C}-\text{I}\cdots\text{F} = 154.15(11)^\circ$  &  $\text{C}-\text{F}\cdots\text{I} = 146.6(2)^\circ$

{Phen-Br now a Cl; isostructural;  $\text{I}\cdots\text{Cl}$  involving equivalent atoms; type I  $\text{I}\cdots\text{F}$  also noted, just below the some of the van der Waals radii}

**14. CORZER** 5-bromo-4-iodo-1-[[4-(trifluoromethyl)phenyl]methyl]-1H-1,2,3-triazole

Rheingold, A.L. Private Communication to the Cambridge Structural Database (2019),  
Refcode CORZER.

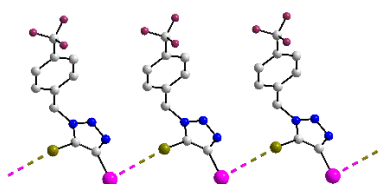

$d(\text{I}\cdots\text{Br}) = 3.7163(11) \text{ \AA}$ ;  $\text{C}-\text{I}\cdots\text{Br} = 84.5(3)^\circ$  &  $\text{C}-\text{Br}\cdots\text{I} = 148.8(3)^\circ$

Orthorhombic  $\text{Pbca}$ ,  $Z' = 1$ ;  $a = 6.7102(5)$ ,  $b = 14.0870(11)$ ,  $c = 25.650(2) \text{ \AA}$

**COMJUM** 4-bromo-5-iodo-1-[[4-(trifluoromethyl)phenyl]methyl]-1H-1,2,3-triazole

Rheingold, A.L. Private Communication to the Cambridge Structural Database (2019),  
Refcode COMJUM.

Monoclinic  $\text{P2}_1/\text{c}$ ,  $Z' = 1$ ;  $a = 12.880(4)$ ,  $b = 7.414(2)$ ,  $c = 13.948(4) \text{ \AA}$ ,  $\beta = 106.247(3)^\circ$

{Isomer: the positions of the I and Br atoms have been interchanged; not isostructural;  $\text{I}\cdots\text{Br}$  contacts are noted but at  $3.88(1) \text{ \AA}$ , beyond the van der Waals radii; the topology of the chain is zig-zag (glide symmetry)}

**16. HIRHUM** 2,4-dibromo-6-(4-iodophenyliminomethyl)phenol

Guo, M.-L.; Nong, X.-R.; Yin, H. 2,4-Dibromo-6-(4-iodo-phenyl-imino-methyl)phenol. Acta Crystallogr., Sect. E: Struct. Rep. Online 2007, 63, o4640. doi: 10.1107/S1600536807055675.



Triclinic  $\text{P}\bar{1}$ ,  $Z' = 1$ ;  $a = 8.0213(17)$ ,  $b = 8.5936(18)$ ,  $c = 11.290(2) \text{ \AA}$ ,  $\alpha = 87.066(3)$ ,  $\beta = 76.541(4)$ ,  $\gamma = 66.203(3)^\circ$

$d(I\cdots Br) = 3.7226(16) \text{ \AA}$ ;  $C-I\cdots Br = 166.3(3)^\circ$  &  $C-Br\cdots I = 112.8(3)^\circ$

CIQBUA      2,4-dibromo-6-(4-bromophenyliminomethyl)phenol

Guo, M.-L.; Zhang, L. 2,4-Dibromo-6-(4-bromophenyliminomethyl)phenol. Acta

Crystallogr., Sect. E: Struct. Rep. Online 63 (2007) o4558 doi: 10.1107/S1600536807054335.

Triclinic  $P\bar{1}$ ,  $Z' = 1$ ;  $a = 7.985(3)$ ,  $b = 8.594(3)$ ,  $c = 11.020(4) \text{ \AA}$ ,  $\alpha = 87.801(6)$ ,  $\beta = 76.688(7)$ ,  $\gamma = 65.180(5)^\circ$

$d(Br\cdots Br) = 3.669(2) \text{ \AA}$ ;  $C-Br\cdots Br = 167.3(3)^\circ$  &  $C-Br\cdots Br = 116.5(3)^\circ$

{The I has been replaced by a Br; isostructural; same linear chain mediated by  $Br\cdots Br$  contacts}

LAPTIH      2-(((4-bromophenyl)imino)methyl)-4,6-diiodophenol

Ji, H.; Ma, H.-P.; Yang, Y.-A.; Zhu, H.-L. 2-[(4-Brom-phenylimino)methyl]-4,6-diiodophenol.

Acta Crystallogr., Sect. E: Struct. Rep. Online 68 (2012) o788. doi: 10.1107/S160053681200551X

Triclinic  $P\bar{1}$ ,  $Z' = 1$ ;  $a = 7.9870(13)$ ,  $b = 8.9811(14)$ ,  $c = 11.3907(18) \text{ \AA}$ ,  $\alpha = 91.093(2)$ ,  $\beta = 99.873(2)$ ,  $\gamma = 114.570(2)^\circ$  {apply transformation  $[1\ 0\ 0\ 0\ -1\ 0\ 0\ 0\ -1]$ }

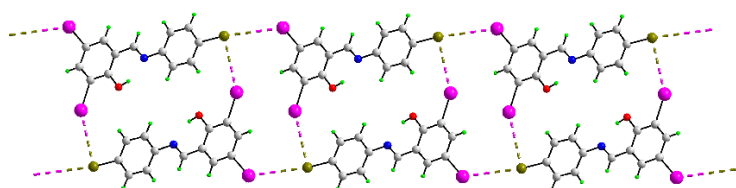

{Interchange of I with Br throughout; two independent type-II  $I\cdots Br$  interaction occur at beyond the van der Waals radii, that is,  $3.9394(10)$ , to give a dimer, and  $3.9489(9) \text{ \AA}$ , to connect the dimers, link molecules into a tape}

RAHWUU      2-bromo-6-(((4-bromophenyl)imino)methyl)-4-chlorophenol

Zhang, X.-L.; Guo, Y.-N. Crystal structure of 2-bromo-4-chloro-6-[(4-bromophenylimino)methyl]phenol,  $C_{13}H_8Br_2ClNO$ . Z. Kristallogr. - New Cryst. Struct. 226 (2011) 521-522. doi: 10.1524/ncrs.2011.0231.

Triclinic  $P\bar{1}$ ,  $Z' = 1$ ;  $a = 7.941(5)$ ,  $b = 8.486(6)$ ,  $c = 11.024(8) \text{ \AA}$ ,  $\alpha = 86.83(3)$ ,  $\beta = 75.39(3)$ ,  $\gamma = 64.50(2)^\circ$

{The Br away from the OH group is now a Cl and the terminal I is now a Br; isostructural; independent type-II  $Br\cdots Br$  and  $Br\cdots Cl$  interactions occur at beyond the van der Waals radii,

that is, 3.815(3) and 3.660(3) Å, respectively, link molecules into a tape as for LAPTIIH; the Br...Br interaction lead to the dimer}

RAJCEM            2-bromo-4-chloro-6-(((4-chlorophenyl)imino)methyl)phenol

Zhang, X.-L. Z. Crystal structure of 2-bromo-4-chloro-6-[(4-chlorophenylimino)methyl]phenol, C<sub>13</sub>H<sub>8</sub>BrCl<sub>2</sub>NO. Kristallogr. - New Cryst. Struct. 226 (2011) 567-568. doi: 10.1524/ncrs.2011.0253.

Monoclinic P2<sub>1</sub>/c, Z' = 1; a = 7.712(2), b = 21.437(5), c = 8.541(2) Å, β = 113.138(3)°

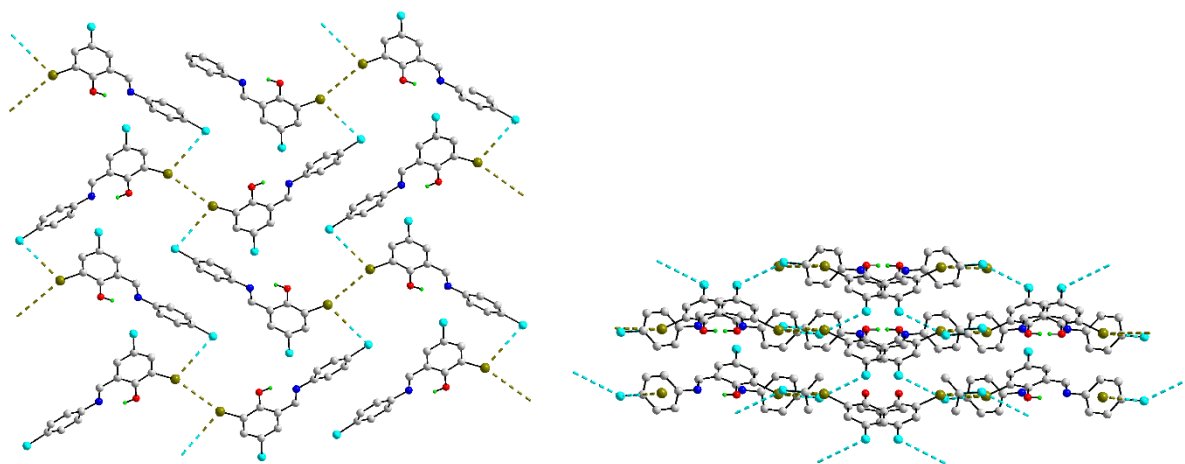

{The Br away from the OH group is now a Cl and the terminal I is now a Cl; independent type-II Br...Br and Br...Cl interactions occur at beyond the van der Waals radii, that is, 3.8365(8) and 3.9614(10), respectively, and link molecules into a 2-D array. Type-II Cl...Cl interactions of 3.6009(12) Å, again beyond the van der Waals radii occur between layers to form the 3D assembly}

JOFFOA            2-bromo-4-chloro-6-(4-fluorophenyliminomethyl)phenol

Puthilibai, G.; Vasudhevan, S.; Rajagopal, G. 2-Bromo-4-chloro-6-(4-fluorophenyliminomethyl)phenol. Acta Crystallogr., Sect. E: Struct. Rep. Online 64 (2008) o1333. doi: 10.1107/S1600536808017443.

Triclinic P1, Z' = 1; a = 8.2274(3), b = 8.6566(3), c = 10.8880(4) Å, α = 69.545(2), β = 70.820(2), γ = 62.341(2)°

d(Br...Br) = 3.5526(9) Å; C-Br...Br = 140.32(10)° & C-Br...Br = 140.32(10)°

{The I atom has been replaced by a F and one of the Br by a Cl; a type-I Br...Br contact over a centre of inversion leads to a two-molecule aggregate}

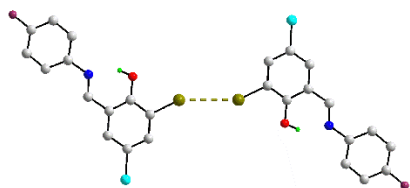

**TESBUQ**      2-(((4-fluorophenyl)imino)methyl)-4,6-diiodophenol

Yang, Z.-M.; Zhu, H.; Zhu, H.-L. Crystal structure of 2[(4-fluorophenylimino)methyl]-4,6-diiodophenol, C<sub>13</sub>H<sub>8</sub>FI<sub>2</sub>NO. Z. Kristallogr. - New Cryst. Struct. 227 (2012) 447-448. doi: 10.1524/ncrs.2012.0202.

Monoclinic Cc, Z' = 2; a = 4.5485(13), b = 35.025(2), c = 17.307(1) Å, β = 95.255(2)°

d(I··I) = 3.7476(15) Å; C–I··I = 161.58(4)° & C–I··I = 109.34(4)°

{Both positions in the di-substituted ring are I and the terminal position is now F; two independent molecules, one self-associates into a chain via I··I contacts}

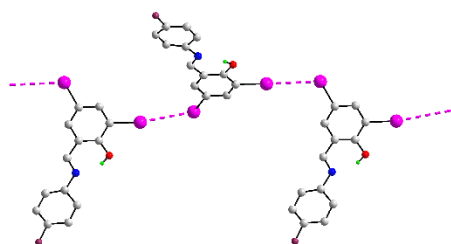

**18. YIRTOJ**      5-bromo-2-iodo-1,3-dimethylbenzene

Liu, R.; Li, Y.-H.; Luo, W ; Liu, S.; Zhu, H.-J. 5-Bromo-2-iodo-1,3-dimethylbenzene. Acta Crystallogr., Sect. E: Struct. Rep. Online 2008, 64, o219. doi: 10.1107/S1600536807064537.

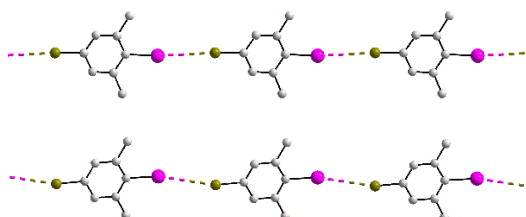

Three independent molecules: two self-associate into linear chains. The iodide and bromide atoms in the third molecule do not form a halogen bonding interaction < 4.0 Å

d(I··Br) = 3.6869(15) Å; C–I··Br = 162.8(2)° & C–Br··I = 161.1(3)° {top view}

d(I··Br) = 3.7413(15) Å; C–I··Br = 159.8(3)° & C–Br··I = 156.0(3)°

Triclinic P1̄, Z' = 3; a = 10.282(2), b = 11.314(2), c = 12.951(3) Å, α = 69.27(3), β = 89.11(3), γ = 83.70(3)°

XISQIA            2-bromo-5-iodo-1,3-dimethylbenzene

Liu, R.; Wu, W.-Y.; Li, Y.-H.; Deng, S.-P.; Zhu, H.-J. Acta Crystallogr., Sect. E: Struct. Rep. Online 64 (2008) o280. doi: 10.1107/S1600536807065415.

Orthorhombic Pnma,  $Z' = 1$ ;  $a = 16.686(3)$ ,  $b = 7.0640(14)$ ,  $c = 8.2130(16)$  Å

{Isomer; molecule has mirror symmetry with the ring in the plane; closest X...X contact is a type-II I...Br contact of 3.9941(13) Å}

## 20. MESMED    2,5-diiodo-1,4-bis(bromomethyl)benzene

Gaefke, G.; Enkelmann, V.; Höger, S. A practical synthesis of 1,4-diiodo-2,5-bis(chloromethyl)benzene and 1,4-diiodo-2,5-bis(bromomethyl)benzene. Synthesis 2006, 2971-2973. doi: 10.1055/s-2006-942534.

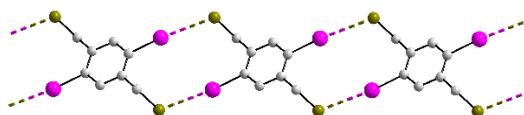

Molecule is centrosymmetric

$d(\text{I}\cdots\text{Br}) = 3.6271(4)$  Å;  $\text{C-I}\cdots\text{Br} = 166.66(7)^\circ$  &  $\text{C-Br}\cdots\text{I} = 97.45(10)^\circ$

Triclinic  $P\bar{1}$ ,  $Z' = 0.5$ ;  $a = 4.3865(4)$ ,  $b = 7.4454(4)$ ,  $c = 9.0972(5)$  Å,  $\alpha = 71.7302(13)$ ,  $\beta = 83.6831(12)$ ,  $\gamma = 84.8666(12)^\circ$

MESMIH            2,5-diiodo-1,4-bis(chloromethyl)benzene

Triclinic  $P\bar{1}$ ,  $Z' = 0.5$ ;  $a = 4.3575(4)$ ,  $b = 7.2917(4)$ ,  $c = 8.9994(5)$  Å,  $\alpha = 70.8917(13)$ ,  $\beta = 83.3779(12)$ ,  $\gamma = 84.9725(12)^\circ$

$d(\text{I}\cdots\text{Cl}) = 3.5373(9)$  Å;  $\text{C-I}\cdots\text{Cl} = 166.82(10)^\circ$  &  $\text{C-Cl}\cdots\text{I} = 99.27(14)^\circ$

{Br replaced by Cl; isostructural; I...Cl interactions form}

AKEWIY            1,4-dibromo-2,5-bis(bromomethyl)benzene

Näther, C.; Jess, I.; Kuś, P.; Jones, P.G. Dimorphism of 1,4-dibromo-2,5-bis(bromomethyl)benzene: crystallographic and physicochemical investigations.

CrystEngComm 18 (2016) 3142-3149. doi: 10.1039/C6CE00438E

Triclinic  $P\bar{1}$ ,  $Z' = 0.5$ ;  $a = 4.3542(3)$ ,  $b = 7.3675(6)$ ,  $c = 8.7140(6)$  Å,  $\alpha = 72.481(7)$ ,  $\beta = 83.722(6)$ ,  $\gamma = 84.917(6)^\circ$

$d(\text{Br}\cdots\text{Br}) = 3.5663(5) \text{ \AA}$ ;  $\text{C}-\text{Br}\cdots\text{Br} = 164.25(8)^\circ$  &  $\text{C}-\text{Br}\cdots\text{Br} = 91.88(7)^\circ$

{I replaced by Br; isostructural;  $\text{Br}\cdots\text{Br}$  interactions form the chain. Weaker  $(3.7610(5) \text{ \AA}) \text{Br}\cdots\text{Br}$  contacts link chains into a layer}

AKEWIY01      1,4-dibromo-2,5-bis(bromomethyl)benzene

Monoclinic  $P2_1/c$ ,  $Z' = 0.5$ ;  $a = 6.6114(5)$ ,  $b = 8.7776(6)$ ,  $c = 9.1807(6) \text{ \AA}$ ,  $\beta = 104.041(7)^\circ$

$d(\text{Br}\cdots\text{Br}) = 3.6617(6) \text{ \AA}$ ;  $\text{C}-\text{Br}\cdots\text{Br} = 171.60(10)^\circ$  &  $\text{C}-\text{Br}\cdots\text{Br} = 102.29(11)^\circ$  - to form chain

$d(\text{Br}\cdots\text{Br}) = 3.5231(6) \text{ \AA}$ ;  $\text{C}-\text{Br}\cdots\text{Br} = 161.48(11)^\circ$  &  $\text{C}-\text{Br}\cdots\text{Br} = 92.01(10)^\circ$

{Polymorph of AKEWIY;  $\text{Br}\cdots\text{Br}$  interactions form the chain as for the other structures but this contact is longer than the inter-chain interactions which generate the layer}

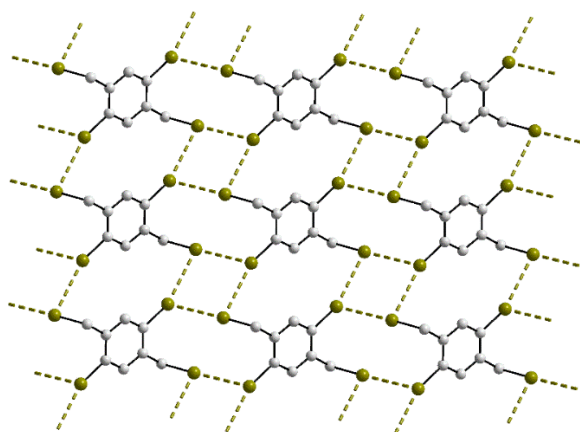

**21. YIZFUL**      6-(2-bromophenyl)-5-iodo-2,3-dihydro-4H-pyran-4-one

Gholap, S.P; Jangid, D.; Fernandes, R.A. Metal-free Brønsted acid-catalyzed rearrangement of  $\delta$ -hydroxyalkynones to 2,3-dihydro-4H-pyran-4-ones: Total synthesis of obolactone and a catechol pyran isolated from *Plectranthus sylvestris*. J. Org. Chem. 2019, 84, 3537-3551. doi: 10.1021/acs.joc.8b03141.

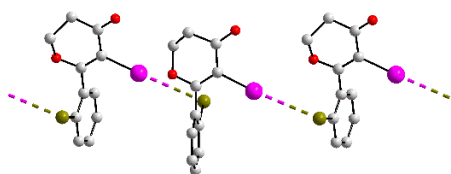

Glide symmetry

$d(\text{I}\cdots\text{Br}) = 3.6011(6) \text{ \AA}$ ;  $\text{C}-\text{I}\cdots\text{Br} = 175.22(11)^\circ$  &  $\text{C}-\text{Br}\cdots\text{I} = 103.29(13)^\circ$

Monoclinic  $P2_1/c$ ,  $Z' = 1$ ;  $a = 10.7766(4)$ ,  $b = 7.8221(3)$ ,  $c = 13.4995(6) \text{ \AA}$ ,  $\beta = 94.552(4)^\circ$

YIZFOF            5-bromo-6-(2-bromophenyl)-2,3-dihydro-4H-pyran-4-one  
 Monoclinic  $P2_1/c$ ,  $Z' = 1$ ;  $a = 10.6794(5)$ ,  $b = 7.5795(3)$ ,  $c = 13.4516(6)$  Å,  $\beta = 92.023(4)^\circ$   
 $d(\text{Br}\cdots\text{Br}) = 3.5512(5)$  Å;  $\text{C}-\text{Br}\cdots\text{Br} = 175.86(9)^\circ$  &  $\text{C}-\text{Br}\cdots\text{Br} = 100.68(9)^\circ$   
 {I replaced by Br; isostructural}

YIZFIZ            5-bromo-6-(2-chlorophenyl)-2,3-dihydro-4H-pyran-4-one  
 Monoclinic  $P2_1/c$ ,  $Z' = 1$ ;  $a = 10.7391(4)$ ,  $b = 7.3560(3)$ ,  $c = 13.5262(4)$  Å,  $\beta = 90.473(3)^\circ$   
 $d(\text{Br}\cdots\text{Cl}) = 3.4969(6)$  Å;  $\text{C}-\text{Br}\cdots\text{Cl} = 174.70(6)^\circ$  &  $\text{C}-\text{Cl}\cdots\text{Br} = 100.98(7)^\circ$   
 {I replaced by Br and Br replaced by Cl; isostructural}

### 23. SELYOY        7-bromo-7-iodo-perhydro-1-azocin-2-one

Hu, T.; Shen, M.; Chen, Q.; Li, C. Pushing radical cyclization from regioselective to regiospecific: Cyclization of amidyl radicals controlled by vinylic halogen substitution. *Org. Lett.* 2006, 8, 2647-2650. doi: 10.1021/ol060983q.

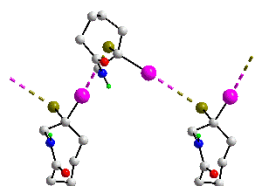

Glide symmetry

$d(\text{I}\cdots\text{Br}) = 3.6666(12)$  Å;  $\text{C}-\text{I}\cdots\text{Br} = 175.7(2)^\circ$  &  $\text{C}-\text{Br}\cdots\text{I} = 115.3(2)^\circ$   
 Orthorhombic  $Pbca$ ,  $Z' = 1$ ;  $a = 7.9917(13)$ ,  $b = 10.5745(18)$ ,  $c = 23.462(4)$  Å

SELYUE            7,7-Diiodo-perhydro-1-azocin-2-one  
 Orthorhombic  $Pbca$ ,  $Z' = 1$ ;  $a = 8.0936(6)$ ,  $b = 10.7502(8)$ ,  $c = 23.5836(17)$  Å  
 $d(\text{I}\cdots\text{I}) = 3.7541(7)$  Å;  $\text{C}-\text{I}\cdots\text{I} = 173.90(16)^\circ$  &  $\text{C}-\text{I}\cdots\text{I} = 112.67(16)^\circ$   
 {Extra I; isostructural; zig-zag chain}

### 29. IMURAL        3,3'-dibromo-2,2',5,5'-tetraiodo-4,4'-bipyridine

$d(\text{I}\cdots\text{Br}) = 3.7136(15)$  Å;  $\text{C}-\text{I}\cdots\text{Br} = 78.41(9)^\circ$  &  $\text{C}-\text{Br}\cdots\text{I} = 170.13(11)^\circ$   
 Orthorhombic  $P2_12_12_1$ ,  $Z' = 1$ ;  $a = 7.985(3)$ ,  $b = 11.766(4)$ ,  $c = 17.716(7)$  Å



2<sub>1</sub>-screw symmetry

{Chain along the a-axis; no I··I nor I··Br within van der Waals radii}

**30. INADIM** 2,2',3,3'-tetrabromo-5,5'-diiodo-4,4'-bipyridine

$d(\text{I} \cdots \text{Br}) = 3.7281(18) \text{ \AA}$ ;  $\text{C}-\text{I} \cdots \text{Br} = 71.91(14)^\circ$  &  $\text{C}-\text{Br} \cdots \text{I} = 161.19(15)^\circ$

Orthorhombic P2<sub>1</sub>2<sub>1</sub>2<sub>1</sub>,  $Z' = 1$ ;  $a = 7.888(4)$ ,  $b = 12.138(5)$ ,  $c = 16.364(8) \text{ \AA}$

{Chain along the a-axis; no I··I nor I··Br within van der Waals radii }

**31. IMUQOY** 2,2',5,5'-tetrabromo-3,3'-diiodo-4,4'-bipyridine

$d(\text{I} \cdots \text{Br}) = 3.7330(7) \text{ \AA}$ ;  $\text{C}-\text{I} \cdots \text{Br} = 162.62(7)^\circ$  &  $\text{C}-\text{Br} \cdots \text{I} = 81.66(7)^\circ$

Orthorhombic P2<sub>1</sub>2<sub>1</sub>2<sub>1</sub>,  $Z' = 1$ ;  $a = 7.997(2)$ ,  $b = 11.722(2)$ ,  $c = 16.948(3) \text{ \AA}$

{Chain along the a-axis; no I··I nor I··Br within van der Waals radii}

**39. IMURUF** 5,5'-dibromo-2,2',3,3'-tetraiodo-4,4'-bipyridine

$d(\text{I} \cdots \text{Br}) = 3.8140(9) \text{ \AA}$ ;  $\text{C}-\text{I} \cdots \text{Br} = 169.03(7)^\circ$  &  $\text{C}-\text{Br} \cdots \text{I} = 77.36(8)^\circ$

Orthorhombic P2<sub>1</sub>2<sub>1</sub>2<sub>1</sub>,  $Z' = 1$ ;  $a = 8.028(2)$ ,  $b = 11.128(2)$ ,  $c = 18.411(4) \text{ \AA}$

{Isostructural; chain along the a-axis; no I··I nor I··Br within van der Waals radii}

**41. INADOS** 5,5'-dibromo-2,2'-dichloro-3,3'-diiodo-4,4'-bipyridine -3D

$d(\text{I} \cdots \text{Br}) = 3.6944(7) \text{ \AA}$ ;  $\text{C}-\text{I} \cdots \text{Br} = 161.40(5)^\circ$  &  $\text{C}-\text{Br} \cdots \text{I} = 83.20(5)^\circ$  - chain along a

$d(\text{I} \cdots \text{Br}) = 3.7405(5) \text{ \AA}$ ;  $\text{C}-\text{I} \cdots \text{Br} = 95.99(5)^\circ$  &  $\text{C}-\text{Br} \cdots \text{I} = 155.52(5)^\circ$

Orthorhombic P2<sub>1</sub>2<sub>1</sub>2<sub>1</sub>,  $Z' = 1$ ;  $a = 8.034(2)$ ,  $b = 11.838(2)$ ,  $c = 16.278(3) \text{ \AA}$

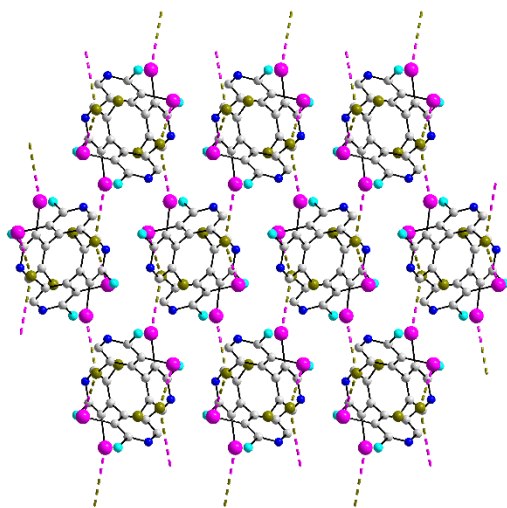

{Chain along the a-axis as observed for other structures but additional, slightly longer I⋯Br are noted leading to a 3-D architecture; no I⋯I, I⋯Cl, Br⋯Br, Br⋯Cl nor Cl⋯Cl within van der Waals radii}

IMURIT            5,5'-dichloro-2,2',3,3'-tetraiodo-4,4'-bipyridine

Orthorhombic  $P2_12_12_1$ ,  $Z' = 1$ ;  $a = 7.957(3)$ ,  $b = 10.910(4)$ ,  $c = 18.607(7)$  Å

{isostructural; isolated molecule with no X⋯X less than 4.0 Å}

IMUQUE            3,3',5,5'-tetrabromo-2,2'-diiodo-4,4'-bipyridine

Orthorhombic  $P2_12_12_1$ ,  $Z' = 1$ ;  $a = 7.800(3)$ ,  $b = 11.334(5)$ ,  $c = 18.031(7)$  Å

$d(\text{Br} \cdots \text{Br}) = 3.7441(15)$  Å;  $\text{C}-\text{Br} \cdots \text{Br} = 171.66(10)^\circ$  &  $\text{C}-\text{Br} \cdots \text{Br} = 75.70(10)^\circ$

{isostructural; Br⋯Br, longer than van der Waals, sustain chain along the a-axis; no I⋯I nor I⋯Br within van der Waals radii}

INAFEK            2,2'-dibromo-3,3'-dichloro-5,5'-diiodo-4,4'-bipyridine

Orthorhombic  $P2_12_12_1$ ,  $Z' = 1$ ;  $a = 7.779(4)$ ,  $b = 12.148(5)$ ,  $c = 16.057(7)$  Å

$d(\text{I} \cdots \text{Cl}) = 3.7327(17)$  Å;  $\text{C}-\text{I} \cdots \text{Cl} = 79.93(6)^\circ$  &  $\text{C}-\text{Cl} \cdots \text{I} = 158.98(8)^\circ$

{Isostructural; chain along the a-axis via I⋯Cl; no additional X⋯X within van der Waals radii}

IMUROZ            3,3'-dichloro-2,2',5,5'-tetraiodo-4,4'-bipyridine

Orthorhombic  $P2_12_12_1$ ,  $Z' = 1$ ;  $a = 7.906(3)$ ,  $b = 11.780(5)$ ,  $c = 17.605(7)$  Å

$d(\text{I} \cdots \text{Cl}) = 3.7163(16)$  Å;  $\text{C}-\text{I} \cdots \text{Cl} = 77.10(7)^\circ$  &  $\text{C}-\text{Cl} \cdots \text{I} = 174.03(8)^\circ$

{Isostructural; chain along the a-axis via I...Cl; no additional I...I within van der Waals radii; long I...I [3.9750(12) Å] occur within chain}

INADAE 3,3',5,5'-tetrabromo-2,2'-dichloro-4,4'-bipyridine

Orthorhombic P2<sub>1</sub>2<sub>1</sub>2<sub>1</sub>, Z' = 1; a = 7.659(4), b = 11.921(6), c = 15.999(11) Å

d(Br...Br) = 3.600(2) Å; C-Br...Br = 162.48(6)° & C-Br...Br = 80.95(6)°

{isostructural; Br...Br sustain chain along the a-axis; no Br...Cl nor Cl...Cl within van der Waals radii}

INADEI 2,2',3,3',5,5'-hexabromo-4,4'-bipyridine

Orthorhombic P2<sub>1</sub>2<sub>1</sub>2<sub>1</sub>, Z' = 1; a = 7.6444(1), b = 11.7708(2), c = 16.6604(3) Å

d(Br...Br) = 3.6378(9) Å; C-Br...Br = 164.5(2)° & C-Br...Br = 79.3(2)°

{isostructural; Br...Br sustain chain along the a-axis; no Br...Br within van der Waals radii}

IMUREP 2,2',3,3',5,5'-hexaiodo-4,4'-bipyridine

Orthorhombic P2<sub>1</sub>2<sub>1</sub>2<sub>1</sub>, Z' = 1; a = 8.219(3), b = 11.493(5), c = 18.059(7) Å

d(I...I) = 3.8016(15) Å; C-I...I = 166.46(8)° & C-I...I = 78.27(8)°

{Isostructural; chain along the a-axis via I...I; no additional I...I within van der Waals radii}

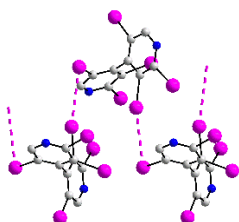

INAFAG 2,2'-dibromo-5,5'-dichloro-3,3'-diiodo-4,4'-bipyridine

d(I...Br) = 3.749(2) Å; C-I...Br = 125.61(10)° & C-Br...I = 157.27(11)°

Orthorhombic P2<sub>1</sub>2<sub>1</sub>2<sub>1</sub>, Z' = 1; a = 7.913(5), b = 11.911(9), c = 15.781(12) Å

d(Br...Br) = 3.565(2) Å; C-Br...Br = 165.29(11)° & C-Br...Br = 73.51(11)°

d(I...Br) = 3.749(2) Å; C-I...Br = 125.61(10)° & C-Br...I = 157.27(11)°

{Chain along the a-axis via Br...Br interactions; these are linked into a 2-D array via I...Br interactions; one bromide connects to both I and Br and the other only forms Br...Br interactions}

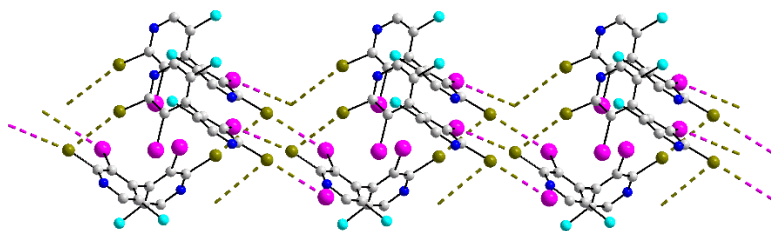

INADUY 2,2'-dibromo-3,3',5,5'-tetraiodo-4,4'-bipyridine

Orthorhombic  $P2_12_12_1$ ,  $Z' = 1$ ;  $a = 8.177(6)$ ,  $b = 12.152(8)$ ,  $c = 16.434(10)$  Å

$d(I \cdots I) = 3.817(2)$  Å;  $C-I \cdots I = 158.60(7)^\circ$  &  $C-I \cdots I = 80.62(6)^\circ$  - chain along  $a$

$d(I \cdots I) = 3.8534(17)$  Å;  $C-I \cdots I = 92.23(6)^\circ$  &  $C-I \cdots I = 160.28(6)^\circ$

{Chain along the  $a$ -axis as observed for other structures but additional, slightly longer  $I \cdots I$  are noted leading to a 3-D architecture; no  $Br \cdots Br$  nor  $I \cdots Br$  within van der Waals radii; same as INADOS; one I forms two contacts}

#### 40. VEGSOR (5-iodopyridinium-2-yl)([4-bromophenyl]sulfonyl)azanide

Gelbrich, T.; Threlfall, T.L.; Hursthouse, M.B. XPac dissimilarity parameters as quantitative descriptors of isostructurality: The case of fourteen 4,5'-substituted benzenesulfonamido-2-pyridines obtained by substituent interchange involving  $CF_3/I/Br/Cl/F/Me/H$ .

CrystEngComm 2012, 14, 5454-5464. doi: 10.1039/c2ce25508a.

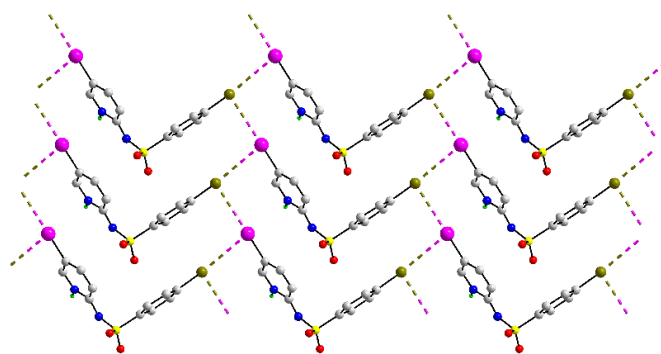

Flat topology

$d(I \cdots Br) = 3.7436(5)$  Å;  $C-I \cdots Br = 158.64(11)^\circ$ ;  $C-Br \cdots I = 87.49(12)^\circ$

$d(I \cdots Br) = 3.7465(6)$  Å;  $C-I \cdots Br = 80.73(11)^\circ$ ;  $C-Br \cdots I = 172.51(12)^\circ$

Monoclinic,  $P2_1/c$ ,  $Z' = 1$ ;  $a = 12.3761(5)$ ,  $b = 19.3231(7)$ ,  $c = 5.5652(2)$  Å,  $\beta = 98.824(1)^\circ$

VEGSIL (5-iodopyridinium-2-yl)([4-iodophenyl]sulfonyl)azanide

Monoclinic,  $P2_1/c$ ,  $Z' = 1$ ;  $a = 12.7165(8)$ ,  $b = 19.5032(14)$ ,  $c = 5.6759(3)$  Å,  $\beta = 99.204(4)^\circ$

$d(I \cdots I) = 3.9277(8)$  Å;  $C-I \cdots I = 160.50(19)^\circ$ ;  $C-I \cdots I = 88.39(19)^\circ$

$d(I \cdots I) = 3.8761(9)$  Å;  $C-I \cdots I = 83.8(2)^\circ$ ;  $C-I \cdots I = 175.2(2)^\circ$

{Isostructural;  $I \cdots I$  interactions}

VEGSUX (5-iodopyridinium-2-yl)([4-chlorophenyl]sulfonyl)azanide

Monoclinic,  $P2_1/c$ ,  $Z' = 1$ ;  $a = 12.1910(5)$ ,  $b = 19.2471(7)$ ,  $c = 5.5793(2)$  Å,  $\beta = 98.441(1)^\circ$

$d(I \cdots Cl) = 3.6890(9)$  Å;  $C-I \cdots Cl = 156.80(8)^\circ$ ;  $C-Cl \cdots I = 87.45(12)^\circ$

$d(I \cdots Cl) = 3.7310(11)$  Å;  $C-I \cdots Cl = 78.73(8)^\circ$ ;  $C-Cl \cdots I = 169.42(13)^\circ$

{Isostructural;  $I \cdots Cl$  interactions}

VEGTAE (5-iodopyridinium-2-yl)([4-fluorophenyl]sulfonyl)azanide

Monoclinic,  $P2_1/c$ ,  $Z' = 1$ ;  $a = 11.2100(3)$ ,  $b = 18.4797(4)$ ,  $c = 6.0146(2)$  Å,  $\beta = 97.104(2)^\circ$

$d(I \cdots F) = 3.742(2)$  Å;  $C-I \cdots F = 152.21(9)^\circ$ ;  $C-F \cdots I = 80.44(16)^\circ$

$d(I \cdots F) = 3.512(3)$  Å;  $C-I \cdots F = 69.70(9)^\circ$ ;  $C-F \cdots I = 159.44(19)^\circ$

{Isostructural;  $I \cdots F$  interactions}
